# Supplementary material
Source: PubMed Central journal article supplement (PMC4649644)
Supplement: supp_115.182550_FigureS1.pdf [file supp_115.182550_FigureS1.pdf]

## Supplementary Material

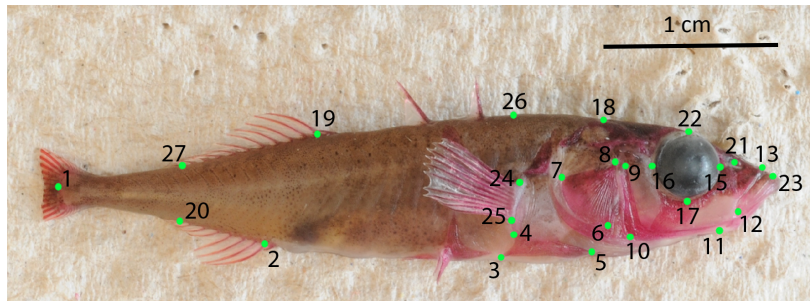

### Landmarks (x and y coordinates)

1. posterior midpoint of the caudal peduncle
2. anterior insertion of the anal fin at the first soft ray
3. posteroventral corner of the ectocoracoid bone
4. posterodorsal corner of the ectocoracoid bone
5. anterior-most corner of the ectocoracoid bone
6. anteroventral corner of the opercle
7. posterodorsal corner of the opercle
8. dorsal edge of the opercle-hyomandibular boundary
9. dorsal-most extent of the preopercle
10. posteroventral corner of the preopercle
11. anterior-most extent of the preopercle along the ventral silhouette
12. posteroventral extent of the maxilla
13. anterodorsal extent of the maxilla
14. *No landmark*
15. anterior margin of the orbit in line with the eye's midpoint
16. posterior margin of the orbit in line with the eye's midpoint
17. ventral margin of the orbit in line with the eye's midpoint
18. posterior extent of neurocranium (i.e., supraoccipital) along dorsal silhouette
19. anterior insertion of the dorsal fin at the first soft ray
20. posterior insertion of the anal fin at the first soft ray
21. edge of the lachrymal at the naris
22. dorsal margin of the orbit in line with the eye's midpoint
23. anterior-most extent of the premaxilla
24. dorsal insertion of the pectoral fin
25. ventral insertion of the pectoral fin
26. dorsum of the trunk over the pectoral fin midpoint
27. posterior insertion of the dorsal fin at the first soft ray

- centroid size (square root of the sum of squared distances of the 26 landmarks from their centroid)

### Meristics

- lateral plate count
- 1<sup>st</sup> dorsal spine presence/absence
- 2<sup>nd</sup> dorsal spine presence/absence
- long gill raker count (on the first gill arch)
- short gill raker count (on the first gill arch)

### Figure S1 All phenotypes scored

Landmark numbers were made consistent with those in Arnegard et al. (2014).
