# Supplementary material
Source: PubMed Central journal article supplement (PMC4649644)
Supplement: supp_115.182550_FigureS2.pdf [file supp_115.182550_FigureS2.pdf]

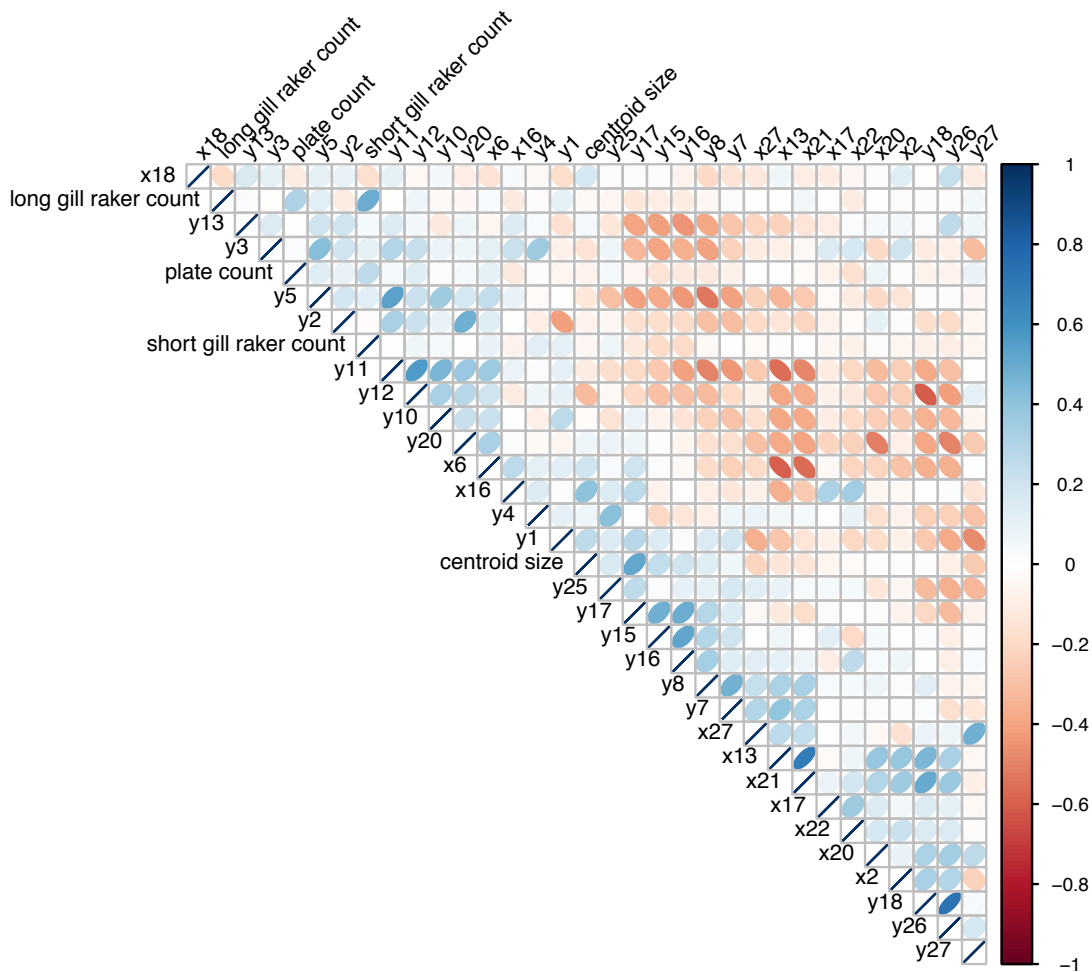

**Figure S2 Correlations among parallel traits in Paxton Lake F<sub>2</sub>s**

The strength of correlation between pairs of parallel traits in Paxton Lake F<sub>2</sub>s is indicated by both color and elongation of the ellipse. F<sub>2</sub> values were corrected for family and sex.
