# Supplementary material
Source: PubMed Central journal article supplement (PMC4649644)
Supplement: supp_115.182550_FigureS3.pdf [file supp_115.182550_FigureS3.pdf]

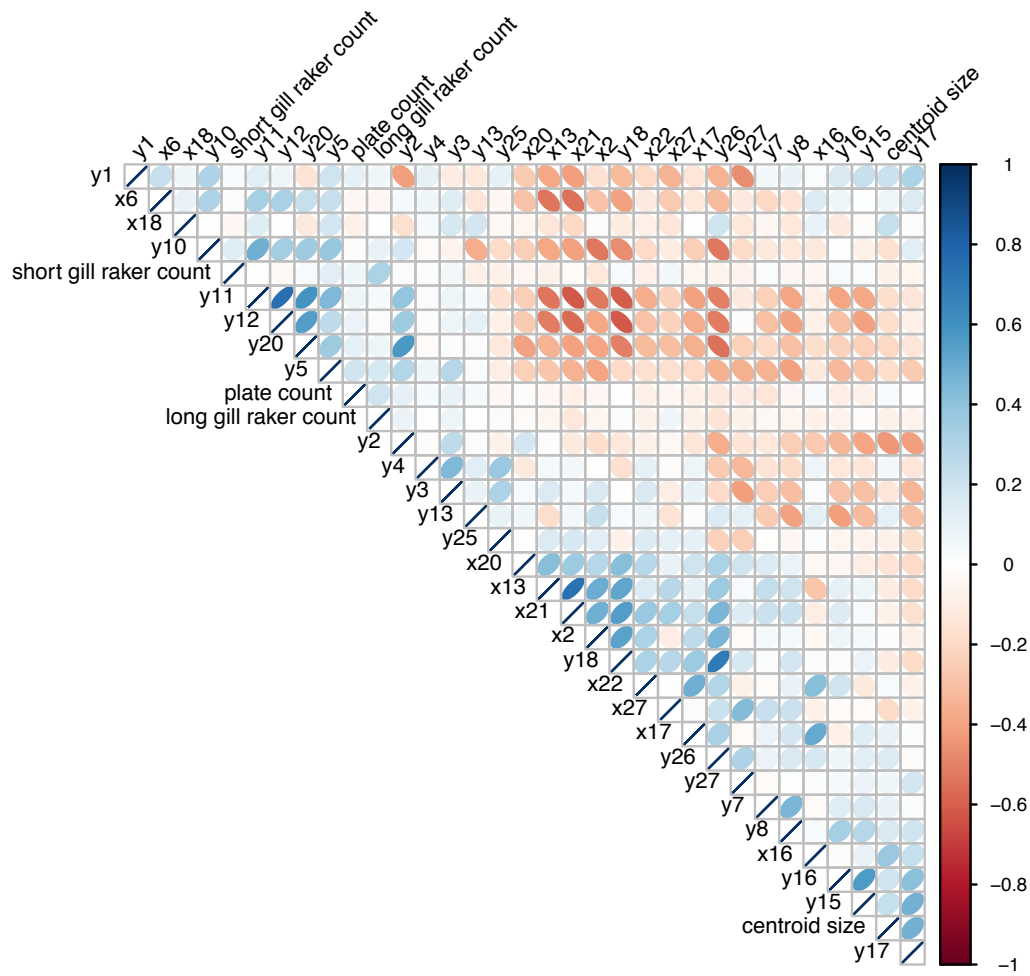

**Figure S3 Correlations among parallel traits in Priest Lake F<sub>2</sub>s**

The strength of correlation between pairs of parallel traits in Priest Lake F<sub>2</sub>s is indicated by both color and elongation of the ellipse. F<sub>2</sub> values were corrected for family and sex.
