# Supplementary material
Source: PubMed Central journal article supplement (PMC4649644)
Supplement: supp_115.182550_FigureS4.pdf [file supp_115.182550_FigureS4.pdf]

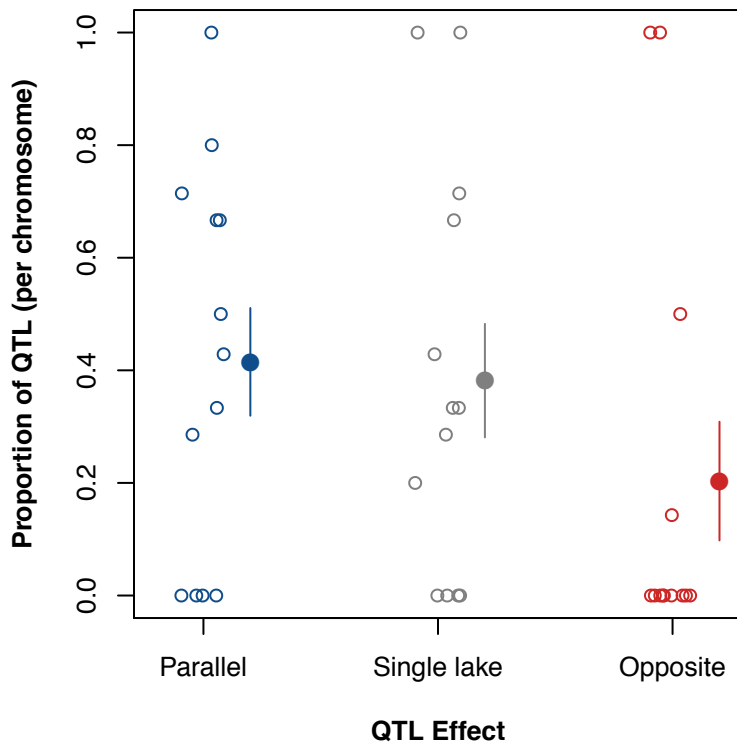

**Figure S4 Proportions of QTL effect categories per chromosome**

The proportion of parallel (blue), single lake (gray) and opposite QTL effects (red) on 13 chromosomes (Figure 2). Filled circles and vertical lines indicate the mean proportion and SE over the 13 chromosomes: 41.5% ± 9.6% SE parallel, 38.1% ± 10.1% SE single lake, and 20.3% ± 10.5% SE opposite effects.
