# Supplementary material
Source: PubMed Central journal article supplement (PMC4649644)
Supplement: supp_115.182550_FigureS5.pdf [file supp_115.182550_FigureS5.pdf]

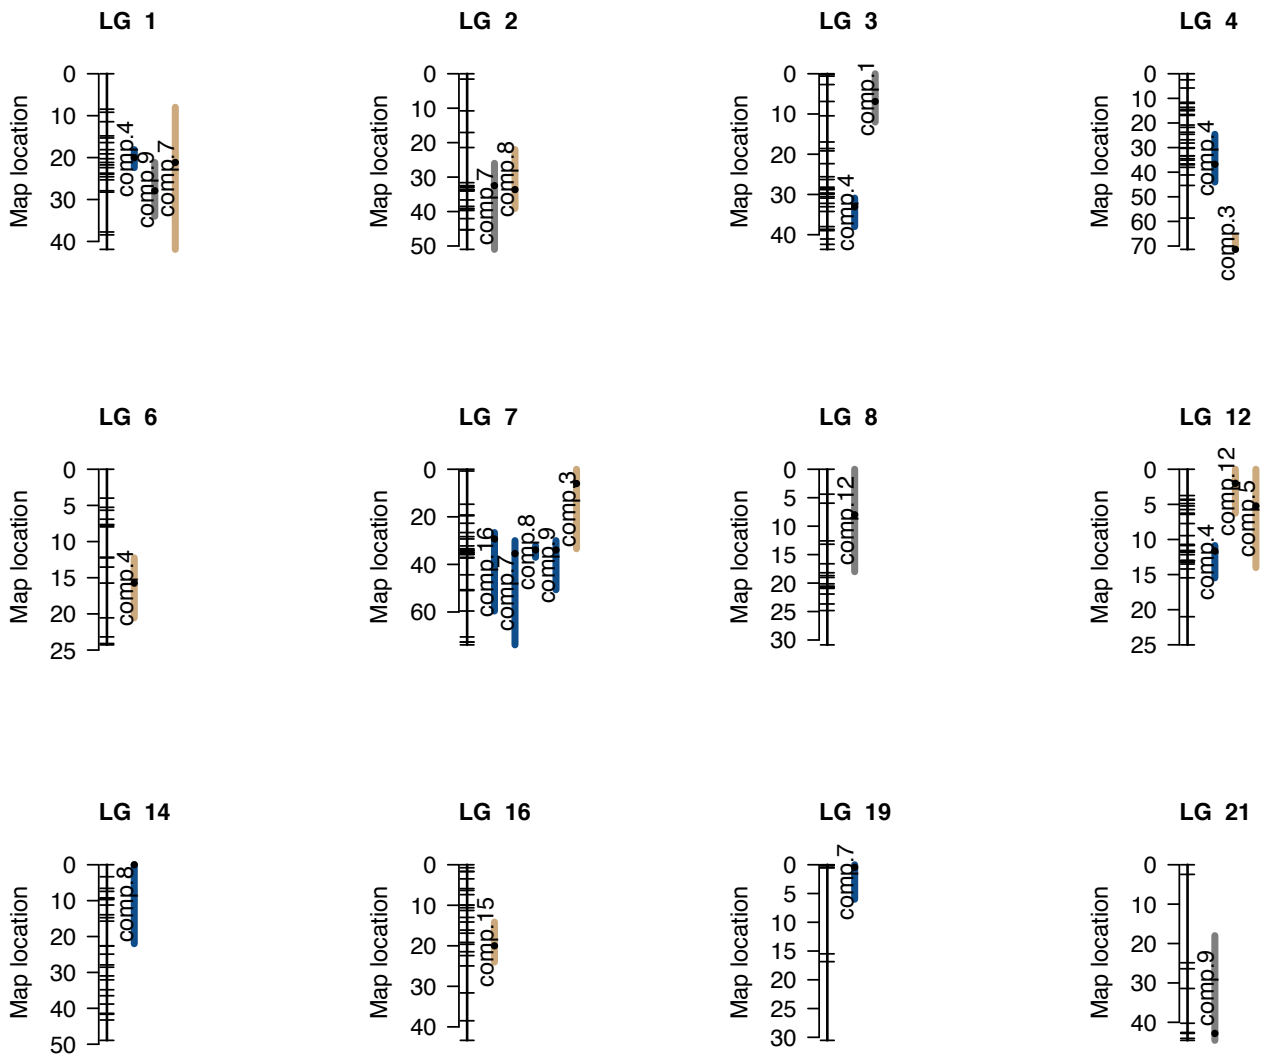

**Figure S5 Map of Principal Component QTL**

Map of 23 QTL (i.e. QTL with an effect in one or both lakes) underlying parallel principal components of parallel traits. Only QTL for principal components accounting for the first 90% of cumulative variance in  $F_2$  phenotypes are shown. Linkage groups on which QTL were detected are shown. For each, the positions of SNP markers in the combined Paxton and Priest linkage map are depicted by tick marks on the left. Colored bars span the 1.5 LOD confidence intervals of QTL. Black dots within bars represent the peak marker position. The principal component phenotype affected by each QTL is indicated to the left its bar. Colors of bars represent the 'QTL Effect' category, as follows: parallel effects – blue; effect in only one lake – grey; opposite effects – red. Tan colored bars represent the candidate QTL for which more than one QTL effect category fit the data nearly equally well.
