# Supplementary material
Source: PubMed Central journal article supplement (PMC4649644)
Supplement: supp_115.182550_TableS2.pdf [file supp_115.182550_TableS2.pdf]

## **Table S2 Identities, map positions, and physical locations of SNPs**

(Starts on next page) Identities, map positions, and physical locations of the 430 single nucleotide polymorphism (SNP) markers used in linkage and QTL analysis. The linkage group (LG) and map position in centimorgans (cM) are provided for each SNP. Each marker name is a combination of the chromosome number (before the colon) and the physical position in base pairs (after the colon) of the SNP in the reference stickleback genome assembly (Broad S1, Feb. 2006) (Jones et al. 2012). Markers identified from unassembled regions of the genome are indicated with 'chrUN'. In such cases, the position in base pairs is based on the composite chrUN in the UCSC genome browser. Marker information can be obtained from the Single Nucleotide Polymorphism Database (dbSNP, available at <http://www.ncbi.nlm.nih.gov/projects/SNP/>), which is hosted by the National Center for Biotechnology Information (NCBI) of the U.S. National Institutes of Health. Data for specific markers may be found by searches of the dbSNP using the submitted SNP ID numbers (ss#). Two SNPs are still awaiting ss# assignment.

| Linkage Group | Map Position (cM) | Marker name (chromosome: position) | NCBI submitted SNP ID numbers (ss#) | Linkage Group | Map Position (cM) | Marker name (chromosome: position) | NCBI submitted SNP ID numbers (ss#) |
|---------------|-------------------|------------------------------------|-------------------------------------|---------------|-------------------|------------------------------------|-------------------------------------|
| 1             | 0                 | chrI:27642534                      | 418642015                           | 2             | 45.24             | chrII:919438                       | 244222781                           |
| 1             | 8.45              | chrUn:18660323                     | 418642624                           | 2             | 45.324            | chrUn:23384875                     | 418642627                           |
| 1             | 9.18              | chrI:22716347                      | 418642010                           | 2             | 50.981            | chrII:533883                       | 120258418                           |
| 1             | 11.439            | chrI:3310077                       | 244222768                           | 3             | 0                 | chrUn:30223426                     | 418642641                           |
| 1             | 14.833            | chrI:19946499                      | 418642005                           | 3             | 0.219             | chrUn:27149198                     | 418642632                           |
| 1             | 15.322            | chrI:2718044                       | 418641984                           | 3             | 0.593             | chrUn:27040022                     | 418642631                           |
| 1             | 16.421            | chrI:4219350                       | 244222770                           | 3             | 2.685             | chrUn:30323959                     | 418642642                           |
| 1             | 18.111            | chrI:3494580                       | 120258412                           | 3             | 6.884             | chrIII:16463929                    | 244222796                           |
| 1             | 19.109            | chrI:14261764                      | 418641998                           | 3             | 10.455            | chrIII:16251071                    | 120258431                           |
| 1             | 20.267            | chrI:15145305                      | 418642000                           | 3             | 16.956            | chrIII:15793968                    | 418642089                           |
| 1             | 21.162            | chrI:4171190                       | 244222769                           | 3             | 18.59             | chrIII:15185662                    | 418642088                           |
| 1             | 21.745            | chrI:17306554                      | 418642003                           | 3             | 19.173            | chrIII:15157782                    | 418642087                           |
| 1             | 22.395            | chrI:7545826                       | 418641993                           | 3             | 22.347            | chrIII:14892994                    | 244222794                           |
| 1             | 23.715            | chrI:20584613                      | 418642006                           | 3             | 25.596            | chrIII:13397314                    | 418642078                           |
| 1             | 23.959            | chrI:22899825                      | 418642011                           | 3             | 26.289            | chrIII:13520975                    | 252841102                           |
| 1             | 24.572            | chrI:22361077                      | 120258417                           | 3             | 28.19             | chrIII:14393183                    | 418642084                           |
| 1             | 25.305            | chrI:3538018                       | 418641987                           | 3             | 28.59             | chrIII:14048561                    | 252841058                           |
| 1             | 27.917            | chrI:26879230                      | 244222777                           | 3             | 28.741            | chrIII:13911180                    | 418642080                           |
| 1             | 28.238            | chrI:25560380                      | 418642013                           | 3             | 28.761            | chrIII:11836494                    | 418642072                           |
| 1             | 37.745            | chrI:1550                          | 418641979                           | 3             | 29.684            | chrIII:13699701                    | 418642079                           |
| 1             | 38.432            | chrUn:37631434                     | 244223001                           | 3             | 29.727            | chrIII:12930427                    | 418642076                           |
| 1             | 41.893            | chrI:913033                        | 120258411                           | 3             | 29.906            | chrIII:14135608                    | 418642081                           |
| 2             | 0                 | chrII:22443700                     | 244222787                           | 3             | 30.523            | chrIII:14456990                    | 252841063                           |
| 2             | 1.55              | chrII:22644752                     | 418642054                           | 3             | 30.9              | chrIII:14248039                    | 418642083                           |
| 2             | 10.77             | chrII:21231538                     | 244222786                           | 3             | 32.208            | chrIII:11302839                    | 418642071                           |
| 2             | 17.049            | chrII:21013052                     | 418642052                           | 3             | 33.049            | chrIII:2376699                     | 418642065                           |
| 2             | 21.421            | chrII:19985741                     | 244222785                           | 3             | 34.228            | chrIII:1968625                     | 418642063                           |
| 2             | 31.618            | chrII:5914538                      | 418642030                           | 3             | 37.992            | chrIII:1198125                     | 120258428                           |
| 2             | 32.478            | chrII:10092618                     | 418642034                           | 3             | 38.662            | chrIII:639237                      | 418642059                           |
| 2             | 32.693            | chrII:8305286                      | 418642033                           | 3             | 38.988            | chrIII:1651721                     | 252841079                           |
| 2             | 33.053            | chrII:6475468                      | 244222782                           | 3             | 41.069            | chrIII:269753                      | 418642057                           |
| 2             | 33.629            | chrII:17453243                     | 418642042                           | 3             | 42.403            | chrIII:105665                      | 418642055                           |
| 2             | 33.653            | chrII:5935944                      | 252841148                           | 3             | 43.645            | chrIII:186390                      | 418642056                           |
| 2             | 33.707            | chrII:12292176                     | 120258425                           | 4             | 0                 | chrUn:27478064                     | 244222993                           |
| 2             | 33.978            | chrII:14611516                     | 244222784                           | 4             | 2.47              | chrUn:27589750                     | 418642633                           |
| 2             | 34.026            | chrII:17312835                     | 418642041                           | 4             | 5.799             | chrUn:27402745                     | 252841068                           |
| 2             | 36.632            | chrII:4530808                      | 120258423                           | 4             | 11.6              | chrIV:32592491                     | 418642150                           |
| 2             | 38.498            | chrII:19324477                     | 418642044                           | 4             | 12.021            | chrIV:32487875                     | 244222812                           |
| 2             | 39.102            | chrII:3931852                      | 418642025                           | 4             | 13.638            | chrIV:32387818                     | 120258447                           |
| 2             | 39.262            | chrII:4157699                      | 252841112                           | 4             | 14.49             | chrIV:32277841                     | 418642146                           |
| 2             | 39.701            | chrII:3516452                      | 120258422                           | 4             | 15.02             | chrIV:32236655                     | 418642145                           |
| 2             | 42.057            | chrII:3384330                      | 120258421                           | 4             | 16.56             | chrIV:32092919                     | 252841132                           |

| Linkage Group | Map Position (cM) | Marker name (chromosome: position) | NCBI submitted SNP ID numbers (ss#) | Linkage Group | Map Position (cM) | Marker name (chromosome: position) | NCBI submitted SNP ID numbers (ss#) |
|---------------|-------------------|------------------------------------|-------------------------------------|---------------|-------------------|------------------------------------|-------------------------------------|
| 4             | 16.927            | chrIV:32005807                     | 120258445                           | 5             | 46.025            | chrV:7791830                       | 252841093                           |
| 4             | 20.838            | chrIV:31740478                     | 244222809                           | 5             | 50.516            | chrUn:10540032                     | 418642614                           |
| 4             | 21.77             | chrIV:31350187                     | 418642140                           | 5             | 53.473            | chrUn:10213240                     | 418642613                           |
| 4             | 23.776            | chrIV:29763654                     | 120258443                           | 5             | 53.596            | chrUn:11980918                     | 252841136                           |
| 4             | 24.599            | chrIV:31611147                     | 252841084                           | 5             | 56.444            | chrUn:12390868                     | 120258569                           |
| 4             | 26.831            | chrIV:30568387                     | 252841083                           | 6             | 0                 | chrVI:487411                       | 418642183                           |
| 4             | 28.149            | chrIV:5165268                      | 418642111                           | 6             | 3.991             | chrVI:6312798                      | 418642187                           |
| 4             | 30.064            | chrIV:21232476                     | 418642127                           | 6             | 5.262             | chrVI:1440771                      | 244222823                           |
| 4             | 30.311            | chrIV:21605258                     | 252841082                           | 6             | 5.672             | chrVI:10415741                     | 418641920                           |
| 4             | 33.352            | chrIV:15721538                     | 244222806                           | 6             | 6.903             | chrVI:11954719                     | 418642192                           |
| 4             | 33.352            | chrIV:15737291                     | 244222807                           | 6             | 7.644             | chrVI:13220597                     | 252841044                           |
| 4             | 34.536            | chrIV:15530121                     | 244222805                           | 6             | 7.721             | chrVI:11873663                     | 120258454                           |
| 4             | 35.12             | chrIV:15052901                     | 244222804                           | 6             | 7.97              | chrVI:12427477                     | 418642193                           |
| 4             | 36.67             | chrIV:10997988                     | 244222801                           | 6             | 12.157            | chrVI:3116218                      | 244222825                           |
| 4             | 36.782            | chrIV:9220132                      | 418642120                           | 6             | 12.259            | chrVI:16870159                     | 244222834                           |
| 4             | 36.984            | chrIV:8545605                      | 418642119                           | 6             | 13.529            | chrVI:218630                       | 244222820                           |
| 4             | 38.029            | chrIV:11367975                     | 120258435                           | 6             | 15.74             | chrVI:14571427                     | 418642200                           |
| 4             | 41.136            | chrIV:4065598                      | 244222799                           | 6             | 20.547            | chrVI:15413799                     | 418642203                           |
| 4             | 45.377            | chrIV:3334208                      | 418642103                           | 6             | 23.176            | chrVI:14976508                     | 418642201                           |
| 4             | 58.662            | chrIV:2045971                      | 418642099                           | 6             | 24.097            | chrVI:15654034                     | 418642204                           |
| 4             | 71.359            | chrIV:219384                       | 418642093                           | 6             | 24.282            | chrVI:15692312                     | 418642205                           |
| 5             | 0                 | chrUn:25831365                     | 418642629                           | 7             | 0                 | chrVII:27918897                    | 418642257                           |
| 5             | 2.542             | chrUn:25946639                     | 244222990                           | 7             | 0.743             | chrUn:29400087                     | 418642638                           |
| 5             | 8.438             | chrV:11316476                      | 252841077                           | 7             | 14.707            | chrVII:26769148                    | 418642251                           |
| 5             | 9.302             | chrV:11368893                      | 418642177                           | 7             | 19.214            | chrVII:26538823                    | 244222842                           |
| 5             | 13.732            | chrV:11509827                      | 418642178                           | 7             | 19.55             | chrVII:26448674                    | 252841125                           |
| 5             | 17.208            | chrV:11642284                      | 418642179                           | 7             | 22.7              | chrVII:26227403                    | 120258461                           |
| 5             | 19.847            | chrV:11722274                      | 418642180                           | 7             | 26.614            | chrVII:25662266                    | 120258460                           |
| 5             | 20.126            | chrV:10649179                      | 252841089                           | 7             | 28.341            | chrVII:25193081                    | 418642246                           |
| 5             | 23.802            | chrV:10674055                      | 418642173                           | 7             | 29.302            | chrVII:24988330                    |                                     |
| 5             | 30.785            | chrV:10028353                      | 418642167                           | 7             | 32.219            | chrVII:24217606                    | 418642245                           |
| 5             | 31.771            | chrV:9884672                       | 418642164                           | 7             | 33.407            | chrVII:19857837                    | 418642237                           |
| 5             | 31.771            | chrV:9911653                       | 418642165                           | 7             | 33.931            | chrVII:16848769                    | 418642232                           |
| 5             | 32.969            | chrV:9768052                       | 252841108                           | 7             | 34.008            | chrVII:24203557                    | 120258459                           |
| 5             | 34.423            | chrV:9157076                       | 244222818                           | 7             | 34.209            | chrVII:23703797                    | 418642243                           |
| 5             | 40.776            | chrV:8327818                       | 244222816                           | 7             | 34.447            | chrVII:22798737                    | 418642240                           |
| 5             | 42.038            | chrV:1238066                       | 120258448                           | 7             | 34.985            | chrVII:21302029                    | 418642238                           |
| 5             | 43.017            | chrV:1727383                       | 418642153                           | 7             | 35.124            | chrVII:20883742                    | 252841067                           |
| 5             | 43.695            | chrV:2528528                       | 244222814                           | 7             | 35.45             | chrVII:18353106                    | 244222839                           |
| 5             | 44.689            | chrUn:11085407                     | 418642615                           | 7             | 35.809            | chrVII:13452516                    | 244222836                           |
| 5             | 45.499            | chrV:5064057                       | 418642160                           | 7             | 35.815            | chrVII:5552972                     | 252841066                           |
| 5             | 45.501            | chrV:4819972                       | 418642158                           | 7             | 37.029            | chrVII:5936068                     | 120258457                           |

| Linkage Group | Map Position (cM) | Marker name (chromosome: position) | NCBI submitted SNP ID numbers (ss#) | Linkage Group | Map Position (cM) | Marker name (chromosome: position) | NCBI submitted SNP ID numbers (ss#) |
|---------------|-------------------|------------------------------------|-------------------------------------|---------------|-------------------|------------------------------------|-------------------------------------|
| 7             | 37.322            | chrVII:4310181                     | 418642225                           | 9             | 32.728            | chrIX:13852312                     | 418642311                           |
| 7             | 44.369            | chrVII:2559099                     | 418642220                           | 9             | 33.542            | chrIX:803523                       | 252841065                           |
| 7             | 50.636            | chrVII:1569236                     | 418642218                           | 9             | 33.594            | chrIX:16779825                     | 244222869                           |
| 7             | 50.989            | chrVII:1481322                     | 418642217                           | 9             | 36.679            | chrIX:2360337                      | 244222859                           |
| 7             | 59.593            | chrVII:835236                      | 252841091                           | 9             | 37.317            | chrIX:2310926                      | 418642299                           |
| 7             | 70.492            | chrUn:29087782                     | 244222996                           | 9             | 39.339            | chrIX:2089567                      | 244222858                           |
| 7             | 72.645            | chrVII:537136                      | 252841113                           | 9             | 43.455            | chrIX:1273244                      | 244222857                           |
| 7             | 72.679            | chrVII:393417                      | 418642213                           | 9             | 45.903            | chrIX:1417909                      | 418642292                           |
| 7             | 73.819            | chrUn:28671327                     | 244222995                           | 9             | 46.308            | chrIX:1571056                      | 418642294                           |
| 8             | 0                 | chrVIII:19282658                   | 418642286                           | 9             | 52.345            | chrIX:639609                       | 244222856                           |
| 8             | 4.379             | chrVIII:868226                     | 418642258                           | 10            | 0                 | chrX:1275840                       | 418642326                           |
| 8             | 5.961             | chrVIII:18760705                   | 244222855                           | 10            | 4.412             | chrX:14831394                      | 418642358                           |
| 8             | 12.586            | chrVIII:2505620                    | 418642263                           | 10            | 4.526             | chrX:14456479                      | 252841100                           |
| 8             | 13.173            | chrVIII:1929053                    | 244222843                           | 10            | 4.527             | chrX:14549101                      | 252841122                           |
| 8             | 16.606            | chrVIII:2257915                    | 418642261                           | 10            | 6.198             | chrX:14265366                      | 120258486                           |
| 8             | 18.186            | chrVIII:3765115                    | 418642265                           | 10            | 7.06              | chrUn:14127611                     | 418642619                           |
| 8             | 18.689            | chrVIII:3627706                    | 244222844                           | 10            | 8.977             | chrUn:14043112                     | 418642618                           |
| 8             | 19.011            | chrVIII:3987295                    | 120258464                           | 10            | 9.768             | chrUn:24511995                     | 418642628                           |
| 8             | 20.132            | chrVIII:6680213                    | 418642268                           | 10            | 10.14             | chrUn:29017220                     | 418642637                           |
| 8             | 20.538            | chrVIII:8858242                    | 418642273                           | 10            | 10.338            | chrX:13132917                      | 418642352                           |
| 8             | 20.747            | chrVIII:14278829                   | 418642277                           | 10            | 16.368            | chrX:10080391                      | 418642338                           |
| 8             | 20.771            | chrVIII:12472630                   | 252841158                           | 10            | 16.858            | chrX:11139448                      | 252841128                           |
| 8             | 20.929            | chrVIII:13412707                   | 244222846                           | 10            | 17.302            | chrX:4696470                       | 418642330                           |
| 8             | 21.923            | chrVIII:15261158                   | 418642279                           | 10            | 19.902            | chrX:8703061                       | 120258485                           |
| 8             | 23.667            | chrVIII:13577518                   | 252841097                           | 10            | 20.486            | chrX:7113953                       | 120258483                           |
| 8             | 24.825            | chrVIII:14472465                   | 244222848                           | 10            | 22.444            | chrX:11252137                      | 244222875                           |
| 8             | 30.855            | chrVIII:16843576                   | 418642285                           | 10            | 24.019            | chrX:12844036                      | 418642350                           |
| 9             | 0                 | chrIX:19781202                     | 244222870                           | 10            | 28.446            | chrX:12507632                      | 244222877                           |
| 9             | 0.675             | chrIX:20090929                     | 244222871                           | 11            | 0                 | chrXI:16701186                     | 244222888                           |
| 9             | 7.45              | chrIX:19745222                     | 418642321                           | 11            | 0.287             | chrXI:16655205                     | 120258495                           |
| 9             | 17.662            | chrIX:18494397                     | 418642317                           | 11            | 8.458             | chrXI:15154801                     | 418642382                           |
| 9             | 19.295            | chrIX:18826248                     | 418642319                           | 11            | 15.6              | chrUn:32523521                     | 418642646                           |
| 9             | 19.628            | chrIX:19322448                     | 418642320                           | 11            | 20.238            | chrXI:14631875                     | 418642379                           |
| 9             | 24.547            | chrIX:5109672                      | 244222860                           | 11            | 20.482            | chrXI:14691162                     | 418642380                           |
| 9             | 25.033            | chrIX:4882924                      | 120258472                           | 11            | 20.626            | chrXI:14830913                     | 244222885                           |
| 9             | 27.249            | chrIX:5403530                      | 120258474                           | 11            | 23.738            | chrXI:15005173                     | 244222886                           |
| 9             | 28.314            | chrIX:5568375                      | 244222863                           | 11            | 31.588            | chrXI:12097498                     | 418642375                           |
| 9             | 30.384            | chrIX:12933483                     | 244222865                           | 11            | 31.877            | chrXI:10976029                     | 244222883                           |
| 9             | 30.606            | chrIX:7146708                      | 418642304                           | 11            | 34.655            | chrXI:9039275                      | 252841094                           |
| 9             | 31.139            | chrIX:15670033                     | 244222868                           | 11            | 35.303            | chrXI:7355052                      | 418642370                           |
| 9             | 31.408            | chrIX:7893416                      | 418642306                           | 11            | 37.738            | chrXI:12746496                     | 244222884                           |
| 9             | 31.862            | chrIX:13553866                     | 252841127                           | 11            | 38.425            | chrXI:3120961                      | 244222880                           |

| Linkage Group | Map Position (cM) | Marker name (chromosome: position) | NCBI submitted SNP ID numbers (ss#) | Linkage Group | Map Position (cM) | Marker name (chromosome: position) | NCBI submitted SNP ID numbers (ss#) |
|---------------|-------------------|------------------------------------|-------------------------------------|---------------|-------------------|------------------------------------|-------------------------------------|
| 11            | 42.418            | chrXI:1017481                      | 120258488                           | 13            | 21.03             | chrXIII:2632698                    | 244222901                           |
| 11            | 43.126            | chrXI:1449684                      | 120258489                           | 13            | 22.175            | chrXIII:2523163                    | 120258505                           |
| 11            | 43.715            | chrXI:1266618                      | 418642362                           | 13            | 23.993            | chrXIII:1909687                    | 244222900                           |
| 11            | 46.473            | chrXI:234849                       | 120258487                           | 13            | 24.529            | chrXIII:1698554                    | 418642421                           |
| 12            | 0                 | chrXII:17758877                    | 244222897                           | 13            | 27.703            | chrXIII:1001571                    | 120258503                           |
| 12            | 3.744             | chrXII:16628544                    | 418642412                           | 13            | 28.789            | chrXIII:2105469                    | 418642423                           |
| 12            | 4.281             | chrXII:2242677                     | 418642394                           | 14            | 0                 | chrXIV:14049917                    | 252841090                           |
| 12            | 4.39              | chrUn:26305459                     | 244222991                           | 14            | 3.337             | chrUn:21213332                     | 120258571                           |
| 12            | 4.88              | chrXII:16877465                    | 418642413                           | 14            | 6.577             | chrXIV:11054767                    | 120258517                           |
| 12            | 5.223             | chrXII:3026329                     | 418642398                           | 14            | 7.427             | chrXIV:9742642                     | 418642458                           |
| 12            | 5.738             | chrXII:18221941                    | 244222899                           | 14            | 9.222             | chrXIV:6992838                     | 418642456                           |
| 12            | 6.258             | chrXII:4123972                     | 418642400                           | 14            | 9.409             | chrXIV:15137805                    | 418642462                           |
| 12            | 6.422             | chrUn:30606854                     | 244222997                           | 14            | 9.506             | chrXIV:6641188                     | 418642455                           |
| 12            | 7.731             | chrUn:38378170                     | 120258576                           | 14            | 9.686             | chrXIV:7313827                     | 418642457                           |
| 12            | 9.452             | chrXII:3810254                     | 418642399                           | 14            | 11.233            | chrXIV:15033103                    | 418642461                           |
| 12            | 10.731            | chrXII:6012527                     | 418642404                           | 14            | 13.935            | chrXIV:3414352                     | 120258514                           |
| 12            | 10.731            | chrXII:5828898                     | 418642403                           | 14            | 14.748            | chrXIV:3598443                     | 418642452                           |
| 12            | 10.863            | chrXII:5521301                     | 418642402                           | 14            | 15.715            | chrXIV:3534175                     | 120258515                           |
| 12            | 11.573            | chrXII:6399147                     | 252841133                           | 14            | 22.579            | chrXIV:2084777                     | 418642446                           |
| 12            | 11.61             | chrXII:6924609                     | 418642405                           | 14            | 22.648            | chrXIV:1798136                     | 418642443                           |
| 12            | 11.639            | chrXII:6745006                     | 244222892                           | 14            | 24.911            | chrXIV:1713227                     | 120258513                           |
| 12            | 11.825            | chrXII:6913126                     | 120258500                           | 14            | 27.904            | chrXIV:1641269                     | 418642442                           |
| 12            | 12.164            | chrXII:7504339                     | 418642406                           | 14            | 28.549            | chrXIV:1442872                     | 120258512                           |
| 12            | 13.016            | chrXII:16454328                    | 418642411                           | 14            | 30.976            | chrXIV:1383447                     | 244222908                           |
| 12            | 13.016            | chrXII:1589655                     | 120258497                           | 14            | 32.066            | chrXIV:1311694                     | 418642441                           |
| 12            | 13.016            | chrXII:2157795                     | 418642393                           | 14            | 34.828            | chrXIV:1087388                     | 418642439                           |
| 12            | 13.016            | chrXII:15046849                    | 418642410                           | 14            | 36.498            | chrXIV:800076                      | 418642438                           |
| 12            | 13.24             | chrXII:11472159                    | 418642407                           | 14            | 38.817            | chrXIV:721170                      | 244222907                           |
| 12            | 13.498            | chrXII:13045611                    | 244222894                           | 14            | 41.408            | chrXIV:451065                      | 120258511                           |
| 12            | 14.199            | chrXII:14223760                    | 244222895                           | 14            | 41.654            | chrXIV:348659                      | 418642435                           |
| 12            | 15.462            | chrXII:1483544                     | 244222889                           | 14            | 43.257            | chrUn:35285565                     | 418642649                           |
| 12            | 20.999            | chrXII:880748                      | 418642389                           | 14            | 48.931            | chrUn:36334731                     | 244223000                           |
| 12            | 25.007            | chrXII:548804                      | 252841119                           | 15            | 0                 | chrXV:13047331                     | 418642481                           |
| 13            | 0                 | chrXIII:18470329                   | 252841124                           | 15            | 0.602             | chrXV:12281774                     | 418642480                           |
| 13            | 8.132             | chrXIII:17392141                   | 120258510                           | 15            | 3.131             | chrXV:6446874                      | 418642477                           |
| 13            | 8.48              | chrXIII:17249562                   | 418642432                           | 15            | 6.668             | chrXV:2507809                      | 244222914                           |
| 13            | 16.245            | chrXIII:8085851                    | 418642430                           | 15            | 7.328             | chrXV:3703641                      | 418642475                           |
| 13            | 17.207            | chrXIII:4401535                    | 418642425                           | 15            | 9.649             | chrXV:2169610                      | 244222912                           |
| 13            | 18.717            | chrXIII:4868788                    | 418642428                           | 15            | 12.33             | chrXV:1902350                      | 244222911                           |
| 13            | 19.246            | chrXIII:4621027                    | 418642426                           | 15            | 13.521            | chrXV:1800560                      | 418642468                           |
| 13            | 20.037            | chrXIII:2969182                    | 418642424                           | 15            | 19.973            | chrXV:414608                       | 120258519                           |
| 13            | 20.712            | chrXIII:3109522                    | 120258506                           | 15            | 20.789            | chrXV:505537                       | 418642465                           |

| Linkage Group | Map Position (cM) | Marker name (chromosome: position) | NCBI submitted SNP ID numbers (ss#) | Linkage Group | Map Position (cM) | Marker name (chromosome: position) | NCBI submitted SNP ID numbers (ss#) |
|---------------|-------------------|------------------------------------|-------------------------------------|---------------|-------------------|------------------------------------|-------------------------------------|
| 15            | 26.144            | chrXV:979445                       | 418642466                           | 17            | 27.817            | chrXVII:12022612                   | 120258536                           |
| 15            | 28.551            | chrXV:215800                       | 418642464                           | 17            | 29.614            | chrXVII:1264852                    | 418642508                           |
| 15            | 29.834            | chrXV:11818                        | 418642463                           | 17            | 30.48             | chrXVII:12528572                   | 252841151                           |
| 16            | 0                 | chrXVI:2764206                     | 120258523                           | 17            | 34.32             | chrXVII:769372                     | 244222939                           |
| 16            | 0.74              | chrXVI:2650854                     | 244222922                           | 17            | 34.515            | chrXVII:645029                     | 418642506                           |
| 16            | 1.67              | chrXVI:2392758                     | 244222921                           | 17            | 41.148            | chrXVII:14127979                   | 418642528                           |
| 16            | 1.674             | chrXVI:2483136                     | 252841051                           | 18            | 0                 | chrXVIII:15478444                  | 120258549                           |
| 16            | 3.48              | chrXVI:3206769                     | 244222923                           | 18            | 19.259            | chrXVIII:13773116                  | 418642545                           |
| 16            | 5.889             | chrXVI:13588796                    | 244222930                           | 18            | 23.155            | chrXVIII:13753579                  | 244222958                           |
| 16            | 6.329             | chrXVI:14093156                    | 244222931                           | 18            | 24.456            | chrXVIII:13193140                  | 244222957                           |
| 16            | 7.378             | chrXVI:14963879                    | 244222933                           | 18            | 24.798            | chrXVIII:12818939                  | 120258545                           |
| 16            | 9.956             | chrXVI:12996432                    | 244222929                           | 18            | 26.138            | chrXVIII:12273872                  | 252841150                           |
| 16            | 9.978             | chrXVI:5562355                     | 244222924                           | 18            | 26.312            | chrXVIII:11896010                  | 244222954                           |
| 16            | 10.609            | chrXVI:6415385                     | 418642487                           | 18            | 27.539            | chrXVIII:11765327                  | 120258543                           |
| 16            | 11.281            | chrXVI:9428786                     | 244222926                           | 18            | 27.765            | chrXVIII:11702469                  | 418642543                           |
| 16            | 12.994            | chrXVI:13148331                    | 418642492                           | 18            | 27.765            | chrXVIII:11641450                  | 244222953                           |
| 16            | 14.134            | chrXVI:14283264                    | 244222932                           | 18            | 28.292            | chrXVIII:11504306                  | 418642542                           |
| 16            | 16.126            | chrXVI:15039503                    | 418642494                           | 18            | 29.831            | chrXVIII:13352631                  | 120258546                           |
| 16            | 16.894            | chrXVI:16058672                    | 252841101                           | 18            | 31.323            | chrXVIII:5765162                   | 120258540                           |
| 16            | 19.173            | chrXVI:17471373                    | 418642502                           | 18            | 31.327            | chrXVIII:4836241                   | 120258539                           |
| 16            | 19.623            | chrXVI:18106789                    | 120258529                           | 18            | 34.367            | chrXVIII:3137228                   |                                     |
| 16            | 21.464            | chrXVI:17895677                    | 244222938                           | 18            | 41.287            | chrXVIII:1211531                   | 418642530                           |
| 16            | 22.417            | chrXVI:17405918                    | 418642501                           | 19            | 0                 | chrXIX:8190806                     | 120258554                           |
| 16            | 24.961            | chrXVI:17236926                    | 244222936                           | 19            | 0.054             | chrXIX:14650559                    | 418641975                           |
| 16            | 31.626            | chrXVI:16673569                    | 120258528                           | 19            | 0.099             | chrXIX:18045399                    | 120258558                           |
| 16            | 38.499            | chrUn:37016121                     | 418642651                           | 19            | 0.102             | CH213.119K16:14070                 | 418641977                           |
| 16            | 43.334            | chrUn:26389255                     | 244222992                           | 19            | 0.102             | CH213.21C23:188808                 | 418641953                           |
| 17            | 0                 | chrXVII:1733515                    | 418642509                           | 19            | 0.434             | chrXIX:3737235                     | 418641965                           |
| 17            | 8.642             | chrXVII:12666712                   | 418642526                           | 19            | 0.554             | chrXIX:18043409                    | 252841059                           |
| 17            | 10.714            | chrXVII:2664810                    | 244222940                           | 19            | 15.488            | chrXIX:1546489                     | 418641958                           |
| 17            | 11.707            | chrXVII:2626658                    | 418642511                           | 19            | 16.847            | chrXIX:1472847                     | 120258551                           |
| 17            | 13.517            | chrXVII:2872553                    | 418642512                           | 19            | 30.53             | chrXIX:897343                      | 418641956                           |
| 17            | 18.03             | chrXVII:3906379                    | 244222942                           | 20            | 0                 | chrXX:12622695                     | 244222966                           |
| 17            | 18.272            | chrXVII:10329401                   | 418642524                           | 20            | 0                 | chrXX:12810044                     | 252841048                           |
| 17            | 18.272            | chrXVII:9697366                    | 244222947                           | 20            | 0.278             | chrXX:14562943                     | 418642569                           |
| 17            | 19.473            | chrXVII:3843835                    | 120258534                           | 20            | 0.588             | chrXX:14462157                     | 244222968                           |
| 17            | 20.238            | chrXVII:4909843                    | 244222944                           | 20            | 0.724             | chrXX:14859034                     | 418642571                           |
| 17            | 20.598            | chrUn:2474754                      | 418642603                           | 20            | 1.646             | chrXX:5734841                      | 418642558                           |
| 17            | 20.713            | chrUn:2776586                      | 120258568                           | 20            | 3.948             | chrXX:15996390                     | 418642573                           |
| 17            | 20.713            | chrUn:2632376                      | 252841074                           | 20            | 8.045             | chrXX:16253512                     | 252841060                           |
| 17            | 21.65             | chrXVII:2999556                    | 418642513                           | 20            | 16.409            | chrXX:2080510                      | 418642553                           |
| 17            | 23.546            | chrXVII:9881295                    | 418642523                           | 20            | 22.695            | chrUn:30545876                     | 120258573                           |

| Linkage Group | Map Position (cM) | Marker name (chromosome: position) | NCBI submitted SNP ID numbers (ss#) | Linkage Group | Map Position (cM) | Marker name (chromosome: position) | NCBI submitted SNP ID numbers (ss#) |
|---------------|-------------------|------------------------------------|-------------------------------------|---------------|-------------------|------------------------------------|-------------------------------------|
| 21            | 0                 | chrUn:31339987                     | 244222998                           |               |                   |                                    |                                     |
| 21            | 2.453             | chrUn:28158103                     | 418642634                           |               |                   |                                    |                                     |
| 21            | 24.879            | chrXXI:11060209                    | 120258566                           |               |                   |                                    |                                     |
| 21            | 26.406            | chrXXI:10969152                    | 244222981                           |               |                   |                                    |                                     |
| 21            | 31.416            | chrUn:23042966                     | 418642626                           |               |                   |                                    |                                     |
| 21            | 40.24             | chrXXI:9820534                     | 418642589                           |               |                   |                                    |                                     |
| 21            | 42.589            | chrXXI:7002178                     | 244222977                           |               |                   |                                    |                                     |
| 21            | 42.816            | chrXXI:5737465                     | 244222973                           |               |                   |                                    |                                     |
| 21            | 44.076            | chrXXI:3082227                     | 418642585                           |               |                   |                                    |                                     |
| 21            | 44.583            | chrUn:6720054                      | 244222987                           |               |                   |                                    |                                     |
