# Supplementary material
Source: PubMed Central journal article supplement (PMC4649644)
Supplement: supp_115.182550_TableS5.pdf [file supp_115.182550_TableS5.pdf]

## Table S5 'Combined' QTL scan results

(Starts on next page) The QTL scan results for all QTL detected in our 'combined scan' (i.e. Paxton and Priest Lakes, and including a genotype by lake interaction covariate) are shown. Together, the '1.5 LOD C.I. low (cM)' and '1.5 LOD C.I. high (cM)' columns indicate the range of the 1.5 LOD confidence interval of the genomic location of the QTL. The 'LOD' column indicates the LOD score at the peak marker for the QTL (the marker at which genotypes showed the strongest association with phenotypes). The 'p-value' column indicates the genome-wide significance of the peak marker's LOD score for the associated trait. When QTL were not included in the 'candidate QTL' dataset, the reason is indicated ("trait not parallel" means that the associated trait was not determined to have diverged in parallel and therefore was not a focus of the study.)

| Trait                  | Linkage group | Peak Marker Position (cM) | 1.5 LOD       |                | LOD   | p-value   | Candidate QTL?          |
|------------------------|---------------|---------------------------|---------------|----------------|-------|-----------|-------------------------|
|                        |               |                           | C.I. low (cM) | C.I. high (cM) |       |           |                         |
| plate count            | 2             | 24                        | 18            | 39.1           | 5.59  | 5.27E-02  | yes                     |
| plate count            | 7             | 33.93                     | 33.41         | 34.99          | 24.81 | <1.00E-04 | yes                     |
| plate count            | 16            | 9.98                      | 4             | 22             | 5.66  | 4.68E-02  | yes                     |
| long gill raker count  | 3             | 36                        | 30.9          | 42             | 7.29  | 2.30E-03  | yes                     |
| long gill raker count  | 7             | 35.12                     | 33.41         | 35.81          | 14.12 | <1.00E-04 | yes                     |
| short gill raker count | 1             | 21.16                     | 14            | 23.72          | 9.43  | 2.00E-04  | yes                     |
| short gill raker count | 7             | 34.99                     | 32.22         | 35.81          | 6.67  | 9.40E-03  | yes                     |
| 1st dorsal spine       | 2             | 33.63                     | 24            | 39.26          | 10.39 | <1.00E-04 | no (trait not parallel) |
| x1                     | 2             | 26                        | 18            | 33.05          | 10.61 | <1.00E-04 | no (trait not parallel) |
| y1                     | 8             | 18                        | 10            | 30.86          | 5.97  | 3.45E-02  | yes                     |
| x2                     | 4             | 23.78                     | 14.49         | 26.83          | 5.97  | 5.01E-02  | yes                     |
| x3                     | 1             | 21.16                     | 16.42         | 22.4           | 8.16  | 1.40E-03  | no (trait not parallel) |
| x3                     | 5             | 50.52                     | 30            | 56.44          | 6.4   | 1.57E-02  | no (trait not parallel) |
| x3                     | 12            | 18                        | 8             | 25.01          | 8.57  | 6.00E-04  | no (trait not parallel) |
| y3                     | 4             | 71.36                     | 66            | 71.36          | 5.8   | 4.04E-02  | yes                     |
| y3                     | 7             | 6                         | 0             | 14             | 10.65 | <1.00E-04 | yes                     |
| x4                     | 7             | 33.93                     | 26.61         | 35.81          | 8.4   | 1.10E-03  | no (trait not parallel) |
| y4                     | 7             | 34.99                     | 32.22         | 37.03          | 5.81  | 4.95E-02  | yes                     |
| y5                     | 7             | 35.45                     | 34.21         | 42             | 9.77  | <1.00E-04 | yes                     |
| x6                     | 7             | 34.21                     | 30            | 50.99          | 6.18  | 1.92E-02  | yes                     |
| y6                     | 7             | 37.32                     | 26.61         | 44             | 6.86  | 6.80E-03  | no (trait not parallel) |
| y6                     | 13            | 12                        | 0             | 23.99          | 7.32  | 2.80E-03  | no (trait not parallel) |
| y6                     | 19            | 0                         | 0             | 4              | 11.42 | <1.00E-04 | no (trait not parallel) |
| x7                     | 3             | 6                         | 0.22          | 12             | 7.61  | 1.70E-03  | no (trait not parallel) |
| y7                     | 2             | 33.63                     | 30            | 38             | 6.05  | 2.52E-02  | yes                     |
| y7                     | 7             | 35.45                     | 32.22         | 56             | 6.41  | 1.36E-02  | yes                     |
| x9                     | 3             | 4                         | 0             | 10             | 5.89  | 3.10E-02  | no (trait not parallel) |
| x10                    | 2             | 36.63                     | 28            | 42             | 5.71  | 4.66E-02  | no (trait not parallel) |
| y10                    | 1             | 19.11                     | 18.11         | 26             | 8.36  | 5.00E-04  | yes                     |
| y10                    | 14            | 12                        | 0             | 22             | 10.43 | <1.00E-04 | yes                     |
| x11                    | 1             | 21.16                     | 16.42         | 23.72          | 5.96  | 3.77E-02  | no (trait not parallel) |
| y11                    | 1             | 21.16                     | 15.32         | 26             | 5.86  | 5.35E-02  | yes                     |
| y11                    | 4             | 30                        | 26.83         | 71.36          | 6.31  | 2.86E-02  | yes                     |
| y11                    | 11            | 28                        | 10            | 37.74          | 6.7   | 1.58E-02  | yes                     |
| x12                    | 19            | 0.55                      | 0             | 6              | 6.12  | 4.57E-02  | no (trait not parallel) |
| y12                    | 13            | 27.7                      | 24.53         | 28.79          | 6     | 4.21E-02  | yes                     |
| y12                    | 19            | 0                         | 0             | 10             | 6.85  | 1.28E-02  | yes                     |
| x13                    | 1             | 18.11                     | 16            | 30             | 6.51  | 2.34E-02  | yes                     |
| x13                    | 7             | 28                        | 24            | 33.41          | 6.87  | 1.37E-02  | yes                     |
| x16                    | 1             | 21.75                     | 18.11         | 23.72          | 9.67  | <1.00E-04 | yes                     |
| x16                    | 12            | 5.22                      | 2             | 15.46          | 6.92  | 5.60E-03  | yes                     |
| y16                    | 13            | 28.79                     | 24            | 28.79          | 6.18  | 2.02E-02  | yes                     |

| Trait    | Linkage group | Peak Marker Position (cM) | 1.5 LOD       |                | LOD   | p-value   | Candidate QTL?          |
|----------|---------------|---------------------------|---------------|----------------|-------|-----------|-------------------------|
|          |               |                           | C.I. low (cM) | C.I. high (cM) |       |           |                         |
| x17      | 12            | 6.42                      | 4             | 15.46          | 6.87  | 9.50E-03  | yes                     |
| x18      | 7             | 32.22                     | 29.3          | 37.03          | 6.51  | 1.12E-02  | yes                     |
| y18      | 11            | 34                        | 28            | 42             | 6.44  | 1.24E-02  | yes                     |
| y19      | 1             | 21.75                     | 14            | 41.89          | 6.25  | 2.17E-02  | no (trait not parallel) |
| y19      | 4             | 34.54                     | 30.31         | 38             | 6.7   | 1.02E-02  | no (trait not parallel) |
| y19      | 8             | 26                        | 19.01         | 30.86          | 6.97  | 6.50E-03  | no (trait not parallel) |
| y19      | 12            | 12.16                     | 10.86         | 15.46          | 9.25  | 1.00E-04  | no (trait not parallel) |
| y19      | 14            | 11.23                     | 0             | 36             | 6.01  | 3.22E-02  | no (trait not parallel) |
| y19      | 19            | 0                         | 0             | 6              | 6.19  | 2.46E-02  | no (trait not parallel) |
| x20      | 4             | 20                        | 15.02         | 23.78          | 6.42  | 1.28E-02  | yes                     |
| y22      | 1             | 18                        | 15.32         | 20.27          | 6.71  | 9.20E-03  | no (trait not parallel) |
| x23      | 1             | 21.16                     | 16.42         | 23.72          | 6.75  | 1.67E-02  | no (trait not parallel) |
| x23      | 3             | 6                         | 0             | 10.46          | 8.19  | 2.00E-03  | no (trait not parallel) |
| y25      | 12            | 13.24                     | 10.86         | 21             | 11.06 | <1.00E-04 | yes                     |
| y26      | 1             | 21.75                     | 18.11         | 34             | 7.91  | 9.00E-04  | yes                     |
| y26      | 12            | 13.24                     | 10.86         | 22             | 9.37  | <1.00E-04 | yes                     |
| y26      | 19            | 0.55                      | 0             | 6              | 6.83  | 9.00E-03  | yes                     |
| y27      | 8             | 19.01                     | 16.61         | 30.86          | 5.54  | 5.42E-02  | yes                     |
| y27      | 12            | 13.24                     | 10.73         | 24             | 7.51  | 2.90E-03  | yes                     |
| y27      | 17            | 21.65                     | 12            | 27.82          | 7.15  | 4.40E-03  | yes                     |
| centroid | 1             | 24.57                     | 2             | 32             | 9.64  | 3.00E-04  | yes                     |
