# Supplementary material
Source: PubMed Central journal article supplement (PMC4649644)
Supplement: supp_115.182550_TableS6.pdf [file supp_115.182550_TableS6.pdf]

## Table S6 QTL effects of candidate QTL

(Starts on next page) QTL effect was considered 'parallel' when either the best model of the QTL effect was 'same effect', or when the best model of QTL effect was 'different effect' but the direction of additive effects were 'same'. QTL effect was considered only in a 'single lake' when the best model of the QTL effect was either 'effect in Paxton only' or 'effect in Priest only'. QTL effect was considered 'opposite' when the best model of QTL effect was 'different effect' and the direction of additive effects were 'opposite'. The second best model of QTL effect and the delta AICc between it and the best model is also shown. When the delta AICc was less than two and the 2<sup>nd</sup> best model called for a different QTL effect category than the best model did, we dropped the QTL from any analysis in which QTL effect category was a variable study (indicated by 'NA' in the "QTL effect based on AICc model selection" column). PVE for each QTL in each lake was determined using 'single QTL, single lake linear models'. The 'Priest Entropy' and 'Paxton Entropy' columns show the entropy values (an index of genotype information content, where lower values indicate greater information content), in each lake's cross at the QTL's peak marker.

| Trait                  | Scan QTL was detected in | Linkage group | Peak Marker Position (cM) | Direction of additive effects | 'QTL Effect' based on AICc model selection | Best model of QTL effect | 2nd best model of QTL effect | Delta AICc | PVE in Priest | PVE in Paxton | Priest entropy | Paxton entropy |
|------------------------|--------------------------|---------------|---------------------------|-------------------------------|--------------------------------------------|--------------------------|------------------------------|------------|---------------|---------------|----------------|----------------|
| plate count            | combined                 | 2             | 24                        | same                          | Parallel                                   | same effect              | different effect             | 2.21       | 4.9           | 1.32          | 0.28           | 0.27           |
| plate count            | combined                 | 7             | 33.93                     | same                          | Parallel                                   | different effect         | same effect                  | 0.94       | 9.1           | 12.09         | 0.04           | 0.03           |
| plate count            | combined                 | 16            | 9.98                      | opposite                      | Opposite                                   | different effect         | effect in Priest only        | 2.03       | 6.06          | 0.73          | 0.06           | 0.17           |
| long gill raker count  | combined                 | 7             | 35.12                     | same                          | Parallel                                   | same effect              | different effect             | 2.26       | 6.51          | 6.3           | 0.01           | 0.08           |
| long gill raker count  | combined                 | 3             | 36                        | same                          | NA                                         | effect in Paxton only    | different effect             | 1.12       | 1.08          | 5             | 0.14           | 0.14           |
| short gill raker count | combined                 | 1             | 21.16                     | same                          | Parallel                                   | same effect              | different effect             | 2.72       | 4.13          | 4.32          | 0.07           | 0.17           |
| short gill raker count | combined                 | 7             | 34.99                     | same                          | Parallel                                   | same effect              | different effect             | 0.68       | 1.67          | 3.97          | 0              | 0.08           |
| y1                     | combined                 | 8             | 18                        | same                          | Single lake                                | effect in Paxton only    | same effect                  | 4.14       | 1.58          | 4.18          | 0.09           | 0.12           |
| x2                     | combined                 | 4             | 23.78                     | same                          | Parallel                                   | same effect              | different effect             | 2.99       | 1.48          | 1.13          | 0.08           | 0.21           |
| x2                     | Paxton                   | 7             | 0                         | same                          | NA                                         | effect in Paxton only    | same effect                  | 0.58       | 0.07          | 2.39          | 0.71           | 0.05           |
| x2                     | Priest                   | 14            | 38.82                     | opposite                      | NA                                         | effect in Priest only    | different effect             | 0.39       | 1.92          | 0.37          | 0.08           | 0.16           |
| y3                     | combined                 | 4             | 71.36                     | opposite                      | NA                                         | different effect         | effect in Priest only        | 1.38       | 5.29          | 0.9           | 0.06           | 0.88           |
| y3                     | combined                 | 7             | 6                         | opposite                      | Single lake                                | effect in Paxton only    | different effect             | 2.49       | 0.13          | 8.86          | 0.5            | 0.13           |
| y4                     | combined                 | 7             | 34.99                     | same                          | Parallel                                   | same effect              | different effect             | 2          | 1.56          | 4.08          | 0              | 0.08           |
| y5                     | combined                 | 7             | 35.45                     | same                          | Parallel                                   | same effect              | different effect             | 2.42       | 4.34          | 2.51          | 0              | 0.12           |
| y5                     | Paxton                   | 19            | 2                         | same                          | Parallel                                   | same effect              | different effect             | 0.42       | 0.21          | 3.63          | 0.19           | 0.05           |
| x6                     | combined                 | 7             | 34.21                     | opposite                      | NA                                         | different effect         | effect in Paxton only        | 0.92       | 0.68          | 3.4           | 0.02           | 0.05           |
| x6                     | Priest                   | 4             | 20.84                     | same                          | Parallel                                   | same effect              | different effect             | 1.81       | 3.09          | 0.7           | 0.05           | 0.2            |
| x6                     | Priest                   | 13            | 27.7                      | same                          | Single lake                                | effect in Priest only    | same effect                  | 7.08       | 3.15          | 0.08          | 0.1            | 0.2            |
| y7                     | combined                 | 7             | 35.45                     | same                          | NA                                         | effect in Priest only    | different effect             | 0.94       | 5.9           | 0.52          | 0              | 0.12           |
| y7                     | combined                 | 2             | 33.63                     | opposite                      | Opposite                                   | different effect         | effect in Paxton only        | 5.61       | 2.41          | 3.14          | 0.03           | 0.04           |
| y7                     | Priest                   | 9             | 10                        | same                          | Single lake                                | effect in Priest only    | same effect                  | 3.44       | 4.61          | 0.59          | 0.35           | 0.34           |
| y10                    | combined                 | 1             | 19.11                     | opposite                      | Opposite                                   | different effect         | effect in Priest only        | 9.03       | 2.77          | 1.63          | 0              | 0.01           |
| y10                    | combined                 | 14            | 12                        | same                          | Parallel                                   | same effect              | different effect             | 0.31       | 1.23          | 4.22          | 0.06           | 0.2            |
| y10                    | Paxton                   | 4             | 58                        | opposite                      | Single lake                                | effect in Paxton only    | different effect             | 2.57       | 0.09          | 3.76          | 0.03           | 0.74           |
| y11                    | combined                 | 11            | 28                        | same                          | NA                                         | effect in Priest only    | different effect             | 0.57       | 2.45          | 0.37          | 0.13           | 0.12           |
| y11                    | combined                 | 1             | 21.16                     | opposite                      | Single lake                                | effect in Paxton only    | different effect             | 5.1        | 0.35          | 3.49          | 0.07           | 0.17           |
| y11                    | combined                 | 4             | 30                        | same                          | Single lake                                | effect in Paxton only    | different effect             | 2.4        | 0.38          | 4.13          | 0.01           | 0.24           |
| y12                    | combined                 | 19            | 0                         | same                          | Single lake                                | effect in Priest only    | different effect             | 13.99      | 2.03          | 3.11          | 0.22           | 0.03           |
| y12                    | combined                 | 13            | 27.7                      | same                          | Parallel                                   | same effect              | different effect             | 3.01       | 1.96          | 1.58          | 0.1            | 0.2            |
| y12                    | Paxton                   | 4             | 28.15                     | same                          | Single lake                                | effect in Paxton only    | different effect             | 2.77       | 0.55          | 2.81          | 0.06           | 0.19           |
| x13                    | combined                 | 7             | 28                        | opposite                      | NA                                         | same effect              | different effect             | 0.23       | 2.3           | 1.91          | 0.09           | 0.22           |

| Trait    | Scan QTL was detected in | Linkage group | Peak Marker Position (cM) | Direction of additive effects | 'QTL Effect' based on AICc model selection | Best model of QTL effect | 2nd best model of QTL effect | Delta AICc | PVE in Priest | PVE in Paxton | Priest entropy | Paxton entropy |
|----------|--------------------------|---------------|---------------------------|-------------------------------|--------------------------------------------|--------------------------|------------------------------|------------|---------------|---------------|----------------|----------------|
| x13      | combined                 | 1             | 18.11                     | same                          | Parallel                                   | same effect              | different effect             | 0.31       | 0.57          | 3.71          | 0.08           | 0.17           |
| x16      | combined                 | 1             | 21.75                     | same                          | Parallel                                   | same effect              | different effect             | 2.97       | 6.19          | 3.32          | 0.11           | 0.2            |
| x16      | combined                 | 12            | 5.22                      | same                          | Parallel                                   | different effect         | same effect                  | 0.87       | 5.45          | 1.36          | 0.06           | 0.16           |
| x16      | Paxton                   | 13            | 20.04                     | same                          | Parallel                                   | different effect         | same effect                  | 1.02       | 0.98          | 3.39          | 0.05           | 0.07           |
| y16      | combined                 | 13            | 28.79                     | opposite                      | NA                                         | different effect         | same effect                  | 0.83       | 3.55          | 2.08          | 0.16           | 0.26           |
| y16      | Priest                   | 21            | 42.82                     | same                          | NA                                         | same effect              | effect in Priest only        | 0.34       | 4.22          | 0.54          | 0.01           | 0.87           |
| x17      | combined                 | 12            | 6.42                      | opposite                      | Single lake                                | effect in Priest only    | different effect             | 3.69       | 6.84          | 0.01          | 0.16           | 0.22           |
| x17      | Priest                   | 14            | 34.83                     | same                          | Single lake                                | effect in Priest only    | different effect             | 2.58       | 4.52          | 0.29          | 0              | 0.22           |
| x18      | combined                 | 7             | 32.22                     | opposite                      | Single lake                                | effect in Paxton only    | different effect             | 4.02       | 2.06          | 3.84          | 0.06           | 0.11           |
| y18      | combined                 | 11            | 34                        | same                          | Parallel                                   | same effect              | different effect             | 1.45       | 2.71          | 1.27          | 0.03           | 0.03           |
| y18      | Paxton                   | 4             | 36                        | opposite                      | Single lake                                | effect in Paxton only    | different effect             | 9.02       | 0.16          | 2.85          | 0.02           | 0.04           |
| x20      | combined                 | 4             | 20                        | opposite                      | Single lake                                | effect in Priest only    | effect in Paxton only        | 3.16       | 3.58          | 2.15          | 0.04           | 0.19           |
| x20      | Paxton                   | 1             | 25.31                     | same                          | NA                                         | different effect         | effect in Paxton only        | 1.62       | 1.18          | 3.32          | 0.13           | 0.15           |
| x20      | Priest                   | 12            | 4.39                      | opposite                      | NA                                         | different effect         | effect in Priest only        | 1.21       | 4.34          | 0.75          | 0.05           | 0.17           |
| x21      | Paxton                   | 1             | 20                        | same                          | Single lake                                | effect in Paxton only    | same effect                  | 2.57       | 0.25          | 2.51          | 0.01           | 0.01           |
| x22      | Paxton                   | 7             | 33.93                     | same                          | NA                                         | different effect         | effect in Paxton only        | 0.06       | 0.73          | 3.94          | 0.04           | 0.03           |
| y25      | combined                 | 12            | 13.24                     | same                          | Parallel                                   | same effect              | different effect             | 2.88       | 4.71          | 5.64          | 0.02           | 0.04           |
| y26      | combined                 | 1             | 21.75                     | opposite                      | Single lake                                | effect in Priest only    | different effect             | 2.66       | 4.71          | 0.07          | 0.11           | 0.2            |
| y26      | combined                 | 12            | 13.24                     | same                          | Parallel                                   | same effect              | different effect             | 2.36       | 3.17          | 2.57          | 0.02           | 0.04           |
| y26      | combined                 | 19            | 0.55                      | same                          | Parallel                                   | different effect         | effect in Priest only        | 5.04       | 1.18          | 2.79          | 0.19           | 0.04           |
| y26      | Priest                   | 14            | 36.5                      | opposite                      | Single lake                                | effect in Priest only    | different effect             | 6.62       | 2.83          | 0.05          | 0.07           | 0.18           |
| y27      | combined                 | 12            | 13.24                     | same                          | Parallel                                   | same effect              | different effect             | 2.55       | 4.16          | 2.91          | 0.02           | 0.04           |
| y27      | combined                 | 17            | 21.65                     | opposite                      | Opposite                                   | different effect         | effect in Priest only        | 10.7       | 4.81          | 2.95          | 0.11           | 0.1            |
| y27      | combined                 | 8             | 19.01                     | same                          | Single lake                                | effect in Paxton only    | effect in Priest only        | 1.4        | 2.76          | 2.53          | 0.01           | 0.1            |
| centroid | combined                 | 1             | 24.57                     | same                          | NA                                         | effect in Priest only    | different effect             | 1.14       | 6.4           | 0.91          | 0.07           | 0.13           |
| centroid | Paxton                   | 19            | 0.1                       | opposite                      | NA                                         | effect in Priest only    | same effect                  | 1.28       | 1.24          | 2.96          | 0.21           | 0.02           |
