# Supplementary material
Source: PubMed Central journal article supplement (PMC4649644)
Supplement: supp_115.182550_TableS8.pdf [file supp_115.182550_TableS8.pdf]

## **Table S8 Proportional similarity of QTL use underlying parallel traits**

(Starts on next page) For each QTL, 'PVE in Priest' and 'PVE in Paxton' were determined using a 'multiple QTL linear model' containing genotypic effects of each QTL affecting the same trait (as well as family identity and sex as covariates). These models were run for each lake separately. If the QTL genotype (both additive and dominant components) did not show a significant effect when dropped from a 'single lake, single QTL linear model' then it was not entered in the multiple QTL model for that lake. In this case, the PVE column is left blank. In each lake, proportional contributions of QTL to traits were calculated by scaling the PVEs of all QTL affecting the same trait so that they summed to 1. The proportional similarity of a QTL was taken as the overlap in the proportional contributions of that QTL in the two lakes. The 'proportional similarity of QTL use' underlying any given trait is then the sum of the proportional similarities of all QTL affecting that trait.

| Trait                  | QTL                    | Proportional  |                        | Proportional  |                        | Proportional Similarity |
|------------------------|------------------------|---------------|------------------------|---------------|------------------------|-------------------------|
|                        | (LG # @ position (cM)) | PVE in Priest | Contribution in Priest | PVE in Paxton | Contribution in Paxton |                         |
| plate count            | 16@10.0                | 4.79          | 0.31                   |               |                        | 0.00                    |
| plate count            | 2@24.0                 | 3.39          | 0.22                   | 1.28          | 0.10                   | 0.10                    |
| plate count            | 7@33.9                 | 7.32          | 0.47                   | 12.04         | 0.90                   | 0.47                    |
| long gill raker count  | 7@35.1                 | 6.51          | 1.00                   | 6.23          | 0.56                   | 0.56                    |
| long gill raker count  | 3@36.0                 |               |                        | 4.93          | 0.44                   | 0.00                    |
| short gill raker count | 1@21.2                 | 4.13          | 1.00                   | 4.89          | 0.52                   | 0.52                    |
| short gill raker count | 7@35.0                 |               |                        | 4.54          | 0.48                   | 0.00                    |
| y1                     | 8@18.0                 | 1.58          | 1.00                   | 4.18          | 1.00                   | 1.00                    |
| x2                     | 14@38.8                | 1.70          | 0.57                   |               |                        | 0.00                    |
| x2                     | 4@23.8                 | 1.26          | 0.43                   | 1.11          | 0.32                   | 0.32                    |
| x2                     | 7@0.0                  |               |                        | 2.38          | 0.68                   | 0.00                    |
| y3                     | 4@71.4                 | 5.29          | 1.00                   |               |                        | 0.00                    |
| y3                     | 7@6.0                  |               |                        | 8.86          | 1.00                   | 0.00                    |
| y4                     | 7@35.0                 |               |                        | 4.08          | 1.00                   | 0.00                    |
| y5                     | 7@35.5                 | 4.34          | 1.00                   | 2.44          | 0.41                   | 0.41                    |
| y5                     | 19@2.0                 |               |                        | 3.57          | 0.59                   | 0.00                    |
| x6                     | 13@27.7                | 3.11          | 0.50                   |               |                        | 0.00                    |
| x6                     | 4@20.8                 | 3.06          | 0.50                   |               |                        | 0.00                    |
| x6                     | 7@34.2                 |               |                        | 3.40          | 1.00                   | 0.00                    |
| y7                     | 2@33.6                 | 1.43          | 0.12                   | 3.14          | 1.00                   | 0.12                    |
| y7                     | 7@35.5                 | 5.98          | 0.49                   |               |                        | 0.00                    |
| y7                     | 9@10.0                 | 4.74          | 0.39                   |               |                        | 0.00                    |
| y10                    | 1@19.1                 | 2.61          | 0.71                   | 0.73          | 0.11                   | 0.11                    |
| y10                    | 14@12.0                | 1.07          | 0.29                   | 3.51          | 0.51                   | 0.29                    |
| y10                    | 4@58.0                 |               |                        | 2.68          | 0.39                   | 0.00                    |
| y11                    | 11@28.0                | 2.45          | 1.00                   |               |                        | 0.00                    |
| y11                    | 1@21.2                 |               |                        | 2.60          | 0.44                   | 0.00                    |
| y11                    | 4@30.0                 |               |                        | 3.24          | 0.56                   | 0.00                    |
| y12                    | 13@27.7                | 1.54          | 0.49                   | 1.35          | 0.19                   | 0.19                    |
| y12                    | 19@0.0                 | 1.61          | 0.51                   | 3.14          | 0.44                   | 0.44                    |
| y12                    | 4@28.1                 |               |                        | 2.69          | 0.37                   | 0.00                    |
| x13                    | 7@28.0                 | 2.30          | 1.00                   | 1.31          | 0.30                   | 0.30                    |
| x13                    | 1@18.1                 |               |                        | 3.11          | 0.70                   | 0.00                    |
| x16                    | 1@21.7                 | 4.53          | 0.54                   | 2.31          | 0.37                   | 0.37                    |
| x16                    | 12@5.2                 | 3.79          | 0.46                   | 1.16          | 0.18                   | 0.18                    |
| x16                    | 13@20.0                |               |                        | 2.83          | 0.45                   | 0.00                    |
| y16                    | 13@28.8                | 3.03          | 0.45                   | 2.08          | 1.00                   | 0.45                    |
| y16                    | 21@42.8                | 3.70          | 0.55                   |               |                        | 0.00                    |
| x17                    | 12@6.4                 | 6.00          | 0.62                   |               |                        | 0.00                    |

| Trait         | QTL<br>(LG # @<br>position (cM)) | PVE in<br>Priest | Proportional<br>Contribution<br>in Priest | PVE in<br>Paxton | Proportional<br>Contribution<br>in Paxton | Proportional<br>Similarity |
|---------------|----------------------------------|------------------|-------------------------------------------|------------------|-------------------------------------------|----------------------------|
| x17           | 14@34.8                          | 3.68             | 0.38                                      |                  |                                           | 0.00                       |
| x18           | 7@32.2                           | 2.06             | 1.00                                      | 3.84             | 1.00                                      | 1.00                       |
| y18           | 11@34.0                          | 2.71             | 1.00                                      | 0.88             | 0.26                                      | 0.26                       |
| y18           | 4@36.0                           |                  |                                           | 2.47             | 0.74                                      | 0.00                       |
| x20           | 12@4.4                           | 4.15             | 0.55                                      |                  |                                           | 0.00                       |
| x20           | 4@20.0                           | 3.40             | 0.45                                      | 1.61             | 0.37                                      | 0.37                       |
| x20           | 1@25.3                           |                  |                                           | 2.78             | 0.63                                      | 0.00                       |
| x21           | 1@20.0                           |                  |                                           | 2.51             | 1.00                                      | 0.00                       |
| x22           | 7@33.9                           |                  |                                           | 3.94             | 1.00                                      | 0.00                       |
| y25           | 12@13.2                          | 4.71             | 1.00                                      | 5.64             | 1.00                                      | 1.00                       |
| y26           | 1@21.7                           | 3.02             | 0.38                                      |                  |                                           | 0.00                       |
| y26           | 12@13.2                          | 2.07             | 0.26                                      | 3.00             | 0.48                                      | 0.26                       |
| y26           | 14@36.5                          | 1.62             | 0.20                                      |                  |                                           | 0.00                       |
| y26           | 19@0.6                           | 1.21             | 0.15                                      | 3.22             | 0.52                                      | 0.15                       |
| y27           | 12@13.2                          | 3.47             | 0.34                                      | 2.87             | 0.35                                      | 0.34                       |
| y27           | 17@21.7                          | 4.36             | 0.43                                      | 3.17             | 0.38                                      | 0.38                       |
| y27           | 8@19.0                           | 2.36             | 0.23                                      | 2.21             | 0.27                                      | 0.23                       |
| centroid size | 1@24.6                           | 6.40             | 1.00                                      |                  |                                           | 0.00                       |
| centroid size | 19@0.1                           |                  |                                           | 2.96             | 1.00                                      | 0.00                       |
